# Supplementary material
Source: PubMed Central journal article supplement (PMC8031162)

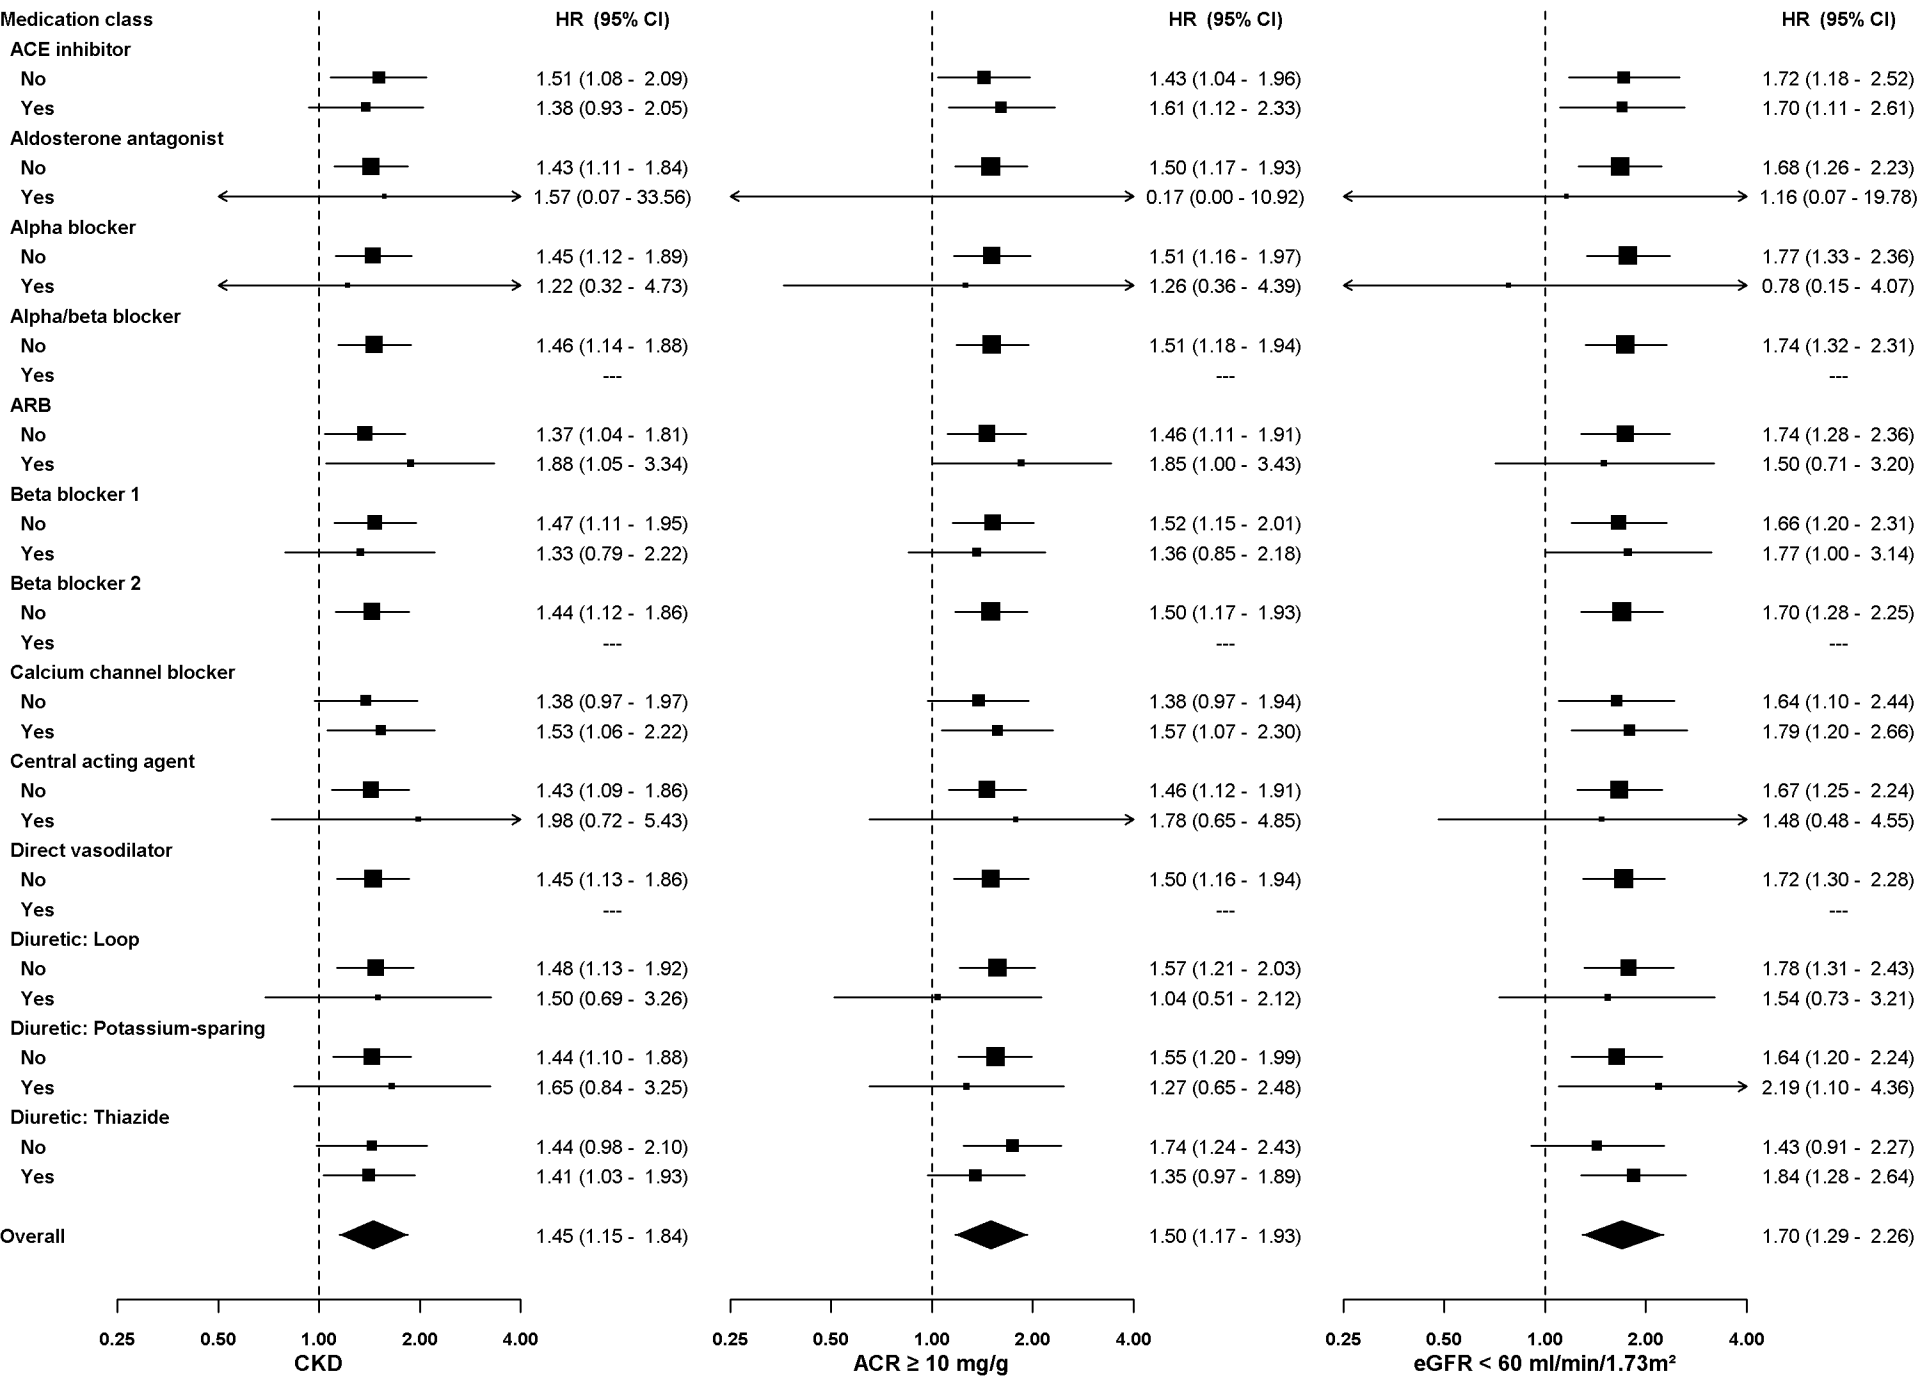

Supplement: JCH-19-1117-s001.pdf [file JCH-19-1117-s001.pdf]
